# Supplementary material
Source: ML conference proceedings conference paper supplement (https://openreview.net/forum?id=nYrFghNHzz)
Supplement: supplementary_material [file attachment]

---

# Supplement to “Learning Individualized Treatment Rules with Many Treatments: A Supervised Clustering Approach Using Adaptive Fusion”

---

**Haixu Ma**

Department of Statistics and Operations Research  
University of North Carolina at Chapel Hill  
Chapel Hill, NC 27516  
haixuma@live.unc.edu

**Donglin Zeng**

Department of Biostatistics  
University of North Carolina at Chapel Hill  
Chapel Hill, NC 27516  
dzeng@email.unc.edu

**Yufeng Liu**

Department of Statistics and Operations Research  
Department of Genetics  
Department of Biostatistics  
University of North Carolina at Chapel Hill  
Chapel Hill, NC 27516  
yfliu@email.unc.edu

In this supplementary material, we present additional implementation details for the algorithm, proof of theorems, and additional figures for simulations and real data analysis.

## A Additional details for the algorithm

### A.1 Estimation of the main effect

We briefly discuss how to obtain the estimation of the main effect function  $M_0(Z)$  based on the weighted parametric regression or nonparametric regression models. By the identification condition in model (1), we have

$$M_0(Z) = \frac{\sum_{a=1}^M \mathbb{E}[Y|Z, A = a]}{M} = \mathbb{E}\left[\frac{Y}{Mp(A|Z)}|Z\right].$$

For parametric models, we assume the linear main effect  $M_0(Z) = Z^\top \boldsymbol{\eta}$  where  $\boldsymbol{\eta} \in \mathbb{R}^p$ . Then, similar to [1] and [2],  $\boldsymbol{\eta}$  can be estimated by the following  $\ell_1$ -penalized inverse-probability weighted regression problem:

$$\min_{\boldsymbol{\eta}} \left\{ \mathbb{E}_n \left[ \left( \frac{Y}{Mp(A|Z)} - Z^\top \boldsymbol{\eta} \right)^2 \right] + \lambda_{M_0} \|\boldsymbol{\eta}\|_1 \right\},$$

where the tuning parameter  $\lambda_{M_0}$  can be selected using cross validation.

For nonparametric regression, we follow [3] to divide the training data into  $M$  folds based on the assigned treatment. Then  $\widehat{\mathbb{E}}[Y|Z, A = a]$  is obtained from the regression forest [4] on  $Y \sim Z$  with the dataset  $\{(y_i, \mathbf{z}_i) : a_i = a\}$ . Finally,  $\widehat{M}_0(Z) = \sum_{a \in \mathcal{A}} \widehat{\mathbb{E}}[Y|X, A = a]/M$ . We refer to [3] for more discussions about the case of misspecifying the main effect, and the corresponding robust and efficient method to solve the misspecification problem.

## A.2 Implementation details for the adaptive proximal gradient algorithm

Recall that  $\mathbf{U} = \text{diag}(\mathbf{X}_1, \mathbf{X}_2, \dots, \mathbf{X}_M) \in \mathbb{R}^{n \times Mp}$  where  $\mathbf{X}_a \in \mathbb{R}^{n_a \times p}$  is the submatrix of  $\mathbf{X}$  and the observations in  $\mathbf{X}_a$  are assigned to treatment  $a$ . Then we can rewrite  $L_n(\boldsymbol{\beta}) = \frac{1}{2} \|\mathbf{U}\boldsymbol{\beta} - \bar{\mathbf{y}}\|_2^2$  where  $\bar{\mathbf{y}} \in \mathbb{R}^n$  is the vector of calculated residual. The gradient of  $L_n(\boldsymbol{\beta})$  can be directly calculated by  $\nabla L_n(\boldsymbol{\beta}) = \mathbf{U}^\top(\mathbf{U}^\top\boldsymbol{\beta} - \bar{\mathbf{y}})$  with Lipschitz constant  $l_n = \lambda_{\max}(\mathbf{U}^\top\mathbf{U})$  where  $\lambda_{\max}(\mathbf{U}^\top\mathbf{U})$  is the maximum eigenvalue of  $\mathbf{U}^\top\mathbf{U}$ . In addition, we follow [5] to approximately calculate the proximal operator of  $P_n$  by solving the dual problem of  $\text{prox}_{s_n P_n}(\boldsymbol{\beta}) := \arg \min_{\bar{\boldsymbol{\beta}}} \{P_n(\bar{\boldsymbol{\beta}}) + \frac{1}{2s_n} \|\bar{\boldsymbol{\beta}} - \boldsymbol{\beta}\|_2^2\}$  for any updated  $\boldsymbol{\beta}$  and the step size  $s_n > 0$ , with the accelerated projected gradient algorithm.

We use  $\hat{\boldsymbol{\beta}}^{(i)}$  to denote the estimation of  $\boldsymbol{\beta}$  in the  $i$ -th iteration. Due to the usage of proximal gradient descent algorithm, the time and space complexities for our algorithm are both  $\mathcal{O}(n^2)$ , where  $n$  is the training sample size. The main steps of the proposed algorithm for SCAF are summarized as below. In particular, the experiments were run on a Linux-based computing server.

---

### Algorithm 1: SCAF

---

**Step 1:** Sort the observations based on the assigned treatment order.

**Step 2:** Remove the main effect  $M_0(Z)$  and get residual  $\bar{\mathbf{y}}$ .

**Step 3:** Implement group lasso to identify heterogeneous variables  $X$  from  $Z$ .

**Step 4:** Use adaptive fast proximal gradient algorithm to solve problem (6) of the main paper:

- (1) Obtain the initial point  $\boldsymbol{\beta}^{(0)}$  from Step 2 and set the desired tolerance  $\epsilon_0 > 0$ ;
- (2) Compute the Lipschitz constant  $l_n = \lambda_{\max}(\mathbf{U}^\top\mathbf{U})$  and set the step-size  $s_n = 1/l_n$ ,  $t_0 = 1$ ;
- (3) Let  $\hat{\boldsymbol{\beta}}^{(0)} := \boldsymbol{\beta}^{(0)}$  and set  $\omega_{l,t}^{(0)} := \min\{B\omega, 1/\|\hat{\boldsymbol{\beta}}_l^{(0)} - \hat{\boldsymbol{\beta}}_t^{(0)}\|_1\}$  for  $P_n^{(0)}(\boldsymbol{\beta})$  ( $l, t \in \mathcal{A}$ );
- (4) For  $i = 0, 1, \dots, i_{\max}$ , do:
  - a. Compute  $\boldsymbol{\beta}^{(i+1)} \approx \text{prox}_{s_n P_n^{(i)}}(\hat{\boldsymbol{\beta}}^{(i)} - s_n \nabla L_n(\hat{\boldsymbol{\beta}}^{(i)}))$  [5];
  - b. Update  $t_{i+1} := (1 + \sqrt{1 + 4t_i^2})/2$ ;
  - c. Perform FISTA [6] with  $\hat{\boldsymbol{\beta}}^{(i+1)} := \boldsymbol{\beta}^{(i+1)} + \frac{t_i - 1}{t_{i+1}}(\boldsymbol{\beta}^{(i+1)} - \boldsymbol{\beta}^{(i)})$ ;
  - d. If  $\|\hat{\boldsymbol{\beta}}^{(i+1)} - \hat{\boldsymbol{\beta}}^{(i)}\| \leq \epsilon_0$ , then end the loop;
  - e. Update  $\omega_{l,t}^{(i+1)} := \min\{B\omega, 1/\|\hat{\boldsymbol{\beta}}_l^{(i+1)} - \hat{\boldsymbol{\beta}}_t^{(i+1)}\|_1\}$  for  $P_n^{(i+1)}(\boldsymbol{\beta})$  ( $l, t \in \mathcal{A}$ );
- (5) End of the main loop.

**Step 5:** Obtain the estimated ITR  $\hat{D}(\mathbf{x}) \in \arg \max_{a \in \mathcal{A}} \mathbf{x}^\top \hat{\boldsymbol{\beta}}_a$  for  $\mathbf{x} \in \mathcal{X}$ .

---

## B Proof of theorems

### B.1 Proof of Theorem 1

Note that under the true group structure, we have

$$\bar{y} = \mathbf{H}\alpha^0 + \epsilon.$$

Since  $\hat{\alpha}^{or} = (\mathbf{H}^\top \mathbf{H})^{-1} \mathbf{H}^\top \bar{y}$ , we have

$$\hat{\alpha}^{or} - \alpha^0 = (\mathbf{H}^\top \mathbf{H})^{-1} \mathbf{H}^\top \epsilon.$$

So,

$$\|\hat{\alpha}^{or} - \alpha^0\|_\infty \leq \|(\mathbf{H}^\top \mathbf{H})^{-1}\|_\infty \|\mathbf{H}^\top \epsilon\|_\infty.$$

We will bound  $\|(\mathbf{H}^\top \mathbf{H})^{-1}\|_\infty$  and  $\|\mathbf{H}^\top \epsilon\|_\infty$  respectively.

First,

$$\begin{aligned} \|(\mathbf{H}^\top \mathbf{H})^{-1}\|_2 &= \sqrt{\lambda_{\max}^2((\mathbf{H}^\top \mathbf{H})^{-1})} \\ &= \frac{1}{\lambda_{\min}(\mathbf{H}^\top \mathbf{H})} \\ &\leq C_1^{-1} N_{\min}^{-1}, \end{aligned}$$

where the inequality is given by Assumption 2. Hence, we have

$$\|(\mathbf{H}^\top \mathbf{H})^{-1}\|_\infty \leq \sqrt{K_n p_n} \|(\mathbf{H}^\top \mathbf{H})^{-1}\|_2 \leq \sqrt{K_n p_n} C_1^{-1} N_{\min}^{-1}.$$

Second, for  $\|\mathbf{H}^\top \epsilon\|_\infty$ , denote  $\mathbf{H}_j$  as the  $j$ -th column of  $\mathbf{H}$ . We have

$$\begin{aligned} Pr(\|\mathbf{H}^\top \epsilon\|_\infty > C\sqrt{n \log n}) &\leq \sum_{j=1}^{K_n p_n} Pr(|\mathbf{H}_j^\top \epsilon| > C\sqrt{n \log n}) \\ &\leq \sum_{j=1}^{K_n p_n} Pr(|\mathbf{H}_j^\top \epsilon| > C\|\mathbf{H}_j\|_2 \sqrt{\log n}) \\ &\leq 2K_n p_n \exp(-c_1 C^2 \log n) = 2K_n p_n n^{-c_1 C^2}, \end{aligned}$$

where the second and third inequalities come from  $\|\mathbf{H}_j\|_2 \leq \sqrt{n}$ , Assumptions 1 and 3.

Combining both parts and let  $C = c_1^{-1/2}$  complete the proof. □

### B.2 Proof of Theorem 2

We follow the proof framework of [7]. Denote  $\mathcal{M}_G \subset \mathbb{R}^{M_n p_n}$  to be parameter space that has true group structure, i.e.,  $\mathcal{M}_G = \{\beta \in \mathbb{R}^{M_n p_n}, \text{ s.t., } \beta_i = \beta_j \text{ for } i, j \in \mathcal{G}_k, 1 \leq k \leq K\}$ . Define the following two operators. (a)  $T : \mathcal{M}_G \rightarrow \mathbb{R}^{K_n p_n}$  and  $T(\beta)$  is the  $K_n p_n$ -dimensional vector whose  $k$ -th  $p_n$ -dimensional vector is the common value of  $\beta_i$  for  $i \in \mathcal{G}_k$ . (b)  $T^* : \mathbb{R}^{M_n p_n} \rightarrow \mathbb{R}^{K_n p_n}$  and

$$T^*(\beta) = \left\{ \frac{\sum_{i \in \mathcal{G}_k} \beta_i}{|\mathcal{G}_k|} \right\}_{k=1}^{K_n}.$$

In particular, the operator  $T$  will extract the distinct values of  $\beta \in \mathcal{M}_G$ . For any given vector  $\beta \in \mathbb{R}^{M_n p_n}$ , the operator  $T^*$  will construct a corresponding vector  $T^*(\beta)$  that belongs to  $\mathcal{M}_G$  by taking the averaging value among the treatments within the same group. Then we can check that for  $\beta \in \mathcal{M}_G$ ,  $T(\beta) = T^*(\beta)$ . For any  $\beta \in \mathbb{R}^{M_n p_n}$ , denote  $\beta^* = T^{-1} T^*(\beta) \in \mathbb{R}^{M_n p_n}$  to be the vector expanded from  $T^*(\beta)$  according to the true group structure.

Consider the following neighborhood of  $\beta^0$ :

$$\Theta_n = \{\beta, \text{ s.t., } \|\beta - \beta^0\|_\infty \leq \phi_n\},$$

where  $\phi_n$  is defined in Theorem 1. From Theorem 1, we know that there exists an event  $E_1$  where  $Pr(E_1) \geq 1 - 2K_n p_n/n$ , such that, conditional on  $E_1$ , we have  $\hat{\beta}^{or} \in \Theta_n$ . Now we aim to prove the following two arguments.

(1) For any  $\beta \in \Theta_n$  such that  $\beta^* \neq \hat{\beta}^{or}$ , we have  $Q_n(\beta^*; \lambda_n) > Q_n(\hat{\beta}^{or}; \lambda_n)$ .

(2) There exists another event  $E_2$  where  $Pr(E_2) \geq 1 - 2M_n p_n/n$ , such that, conditional on the event  $E_1 \cap E_2$ , we have  $Q_n(\beta; \lambda_n) \geq Q_n(\beta^*; \lambda_n)$  for any  $\beta \in \Theta_n$ .

If (1) and (2) hold, then we have, for any  $\beta \in \Theta_n$ , conditional on  $E_1 \cap E_2$ ,

$$Q_n(\beta; \lambda_n) \geq Q_n(\beta^*; \lambda_n) > Q_n(\hat{\beta}^{or}; \lambda_n).$$

In other words, the oracle estimator  $\hat{\beta}^{or}$  is the strictly local minimizer of  $Q_n(\beta; \lambda_n)$  in the neighborhood  $\Theta_n$  with probability greater than  $1 - 2(K_n p_n + M_n p_n)/n$  when  $n$  is sufficiently large. Then the results follow.

Now, we start to prove (1) and (2).

Proof of (1): For any  $\beta \in \Theta_n$ , denote  $T^{-1}T^*(\beta) = \beta^* = (\beta_1^*, \dots, \beta_{M_n}^*)^\top \in \mathcal{M}_{\mathcal{G}}$  and denote  $T^*(\beta) = \alpha = (\alpha_1, \dots, \alpha_{K_n})^\top$ . Note that the oracle estimator is the unique minimizer of the  $L_2$  loss, which is the first part of  $Q_n(\beta; \lambda_n)$ . Hence, we can only prove that for any  $\beta^* \in \Theta_n \cap \mathcal{M}_{\mathcal{G}}$ , the penalty term

$$\sum_{1 \leq l < t \leq M_n} p_{\lambda_n}(\|\beta_l^* - \beta_t^*\|_1) = \sum_{1 \leq k < k' \leq K_n} |\mathcal{G}_k| |\mathcal{G}_{k'}| p_{\lambda_n}(\|\alpha_k - \alpha_{k'}\|_1),$$

is a constant. To prove that, based on Assumption 4, we can only show that  $\|\alpha_k - \alpha_{k'}\|_1 \geq \frac{a}{2} \lambda_n$  for any  $k \neq k'$ . Note that

$$\begin{aligned} \|\alpha_k - \alpha_{k'}\|_1 &\geq \|\alpha_k - \alpha_{k'}\|_\infty \geq \|\alpha_k^0 - \alpha_{k'}^0\|_\infty - 2\|\alpha - \alpha^0\|_\infty \\ &= \|\alpha_k^0 - \alpha_{k'}^0\|_\infty - 2 \sup_{1 \leq k \leq K_n} \left\| \sum_{i \in \mathcal{G}_k} \frac{\beta_i - \beta_i^0}{|\mathcal{G}_k|} \right\|_\infty \\ &\geq \|\alpha_k^0 - \alpha_{k'}^0\|_\infty - 2 \sup_{1 \leq k \leq K_n} \sup_{i \in \mathcal{G}_k} \|\beta_i - \beta_i^0\|_\infty \\ &\geq \|\alpha_k^0 - \alpha_{k'}^0\|_\infty - 2\|\beta - \beta^0\|_\infty \\ &\geq b_n/p_n - 2\phi_n \geq a\lambda_n - 2\phi_n \gg \frac{a}{2}\lambda_n \quad (\text{By Assumption 5}). \end{aligned}$$

Hence, the result follows.

Proof of (2): Recall the definition of  $L_n(\beta)$  in (7) and recall that

$$\mathbf{U} = \begin{pmatrix} \mathbf{X}_1 & & & \\ & \mathbf{X}_2 & & \\ & & \ddots & \\ & & & \mathbf{X}_M \end{pmatrix}_{n \times M p}.$$

For any  $\beta \in \Theta_n$ , we have

$$Q_n(\beta; \lambda_n) - Q_n(\beta^*; \lambda_n) = \underbrace{L_n(\beta) - L_n(\beta^*)}_{\Gamma_1} + \underbrace{\sum_{1 \leq l < t \leq M_n} p_{\lambda_n}(\|\beta_l - \beta_t\|_1) - \sum_{1 \leq l < t \leq M_n} p_{\lambda_n}(\|\beta_l^* - \beta_t^*\|_1)}_{\Gamma_2}.$$

By Taylor expansion,

$$\Gamma_1 = -[\mathbf{U}^\top \bar{\mathbf{y}} - \mathbf{U}^\top \mathbf{U} \bar{\boldsymbol{\beta}}]^\top (\beta - \beta^*),$$

where  $\bar{\boldsymbol{\beta}} = \xi \beta + (1 - \xi) \beta^*$  and  $\xi \in (0, 1)$ . For the gradient part, let

$$\mathbf{w} = (\mathbf{w}_1, \mathbf{w}_2, \dots, \mathbf{w}_{M_n})^\top := \mathbf{U}^\top \bar{\mathbf{y}} - \mathbf{U}^\top \mathbf{U} \bar{\boldsymbol{\beta}},$$

where  $\mathbf{w}_m \in \mathbb{R}^{p_n}$  for any  $m = 1, \dots, M_n$ . Then

$$\Gamma_1 = -\mathbf{w}^\top (\beta - \beta^*)$$

$$\begin{aligned}
&= - \sum_{k=1}^{K_n} \sum_{i \in \mathcal{G}_k} \sum_{j \in \mathcal{G}_k} \frac{\mathbf{w}_i^\top (\boldsymbol{\beta}_i - \boldsymbol{\beta}_j)}{|\mathcal{G}_k|} \\
&= - \sum_{k=1}^{K_n} \sum_{i \in \mathcal{G}_k} \sum_{j \in \mathcal{G}_k} \frac{(\mathbf{w}_j - \mathbf{w}_i)^\top (\boldsymbol{\beta}_j - \boldsymbol{\beta}_i)}{2|\mathcal{G}_k|} \\
&= - \sum_{k=1}^{K_n} \sum_{i, j \in \mathcal{G}_k, i < j} \frac{(\mathbf{w}_j - \mathbf{w}_i)^\top (\boldsymbol{\beta}_j - \boldsymbol{\beta}_i)}{|\mathcal{G}_k|} \\
&\geq - \sum_{k=1}^{K_n} \sum_{i, j \in \mathcal{G}_k, i < j} \frac{\|\mathbf{w}_j - \mathbf{w}_i\|_\infty \|\boldsymbol{\beta}_j - \boldsymbol{\beta}_i\|_1}{|\mathcal{G}_k|} \\
&\geq - \sum_{k=1}^{K_n} \sum_{i, j \in \mathcal{G}_k, i < j} \frac{2\|\mathbf{w}\|_\infty \|\boldsymbol{\beta}_j - \boldsymbol{\beta}_i\|_1}{|\mathcal{G}_k|}.
\end{aligned}$$

Note that based on the definition of  $\mathbf{w}$ , we have

$$\begin{aligned}
\|\mathbf{w}\|_\infty &\leq \|\mathbf{U}^\top \mathbf{U}(\boldsymbol{\beta}_0 - \bar{\boldsymbol{\beta}})\|_\infty + \|\mathbf{U}^\top \boldsymbol{\epsilon}\|_\infty \\
&\leq \mathcal{O}(K_n p_n \phi_n) + \|\mathbf{U}^\top \boldsymbol{\epsilon}\|_\infty.
\end{aligned}$$

Similar to the previous proof, we have  $Pr(\|\mathbf{U}^\top \boldsymbol{\epsilon}\|_\infty \leq \mathcal{O}(\sqrt{n \log n})) \geq 1 - 2M_n p_n/n$ . Hence, we have

$$\Gamma_1 \geq - \sum_{k=1}^{K_n} \sum_{i, j \in \mathcal{G}_k, i < j} \frac{\mathcal{O}(\sqrt{n \log n}) \|\boldsymbol{\beta}_j - \boldsymbol{\beta}_i\|_1}{|\mathcal{G}_k|},$$

with probability at least  $1 - 2M_n p_n/n$ .

For  $\Gamma_2$ , note that for treatments  $i, j$  that belong to two different groups  $\mathcal{G}_k$  and  $\mathcal{G}_{k'}$ , we have

$$\|\boldsymbol{\beta}_i - \boldsymbol{\beta}_j\|_1 \geq \|\boldsymbol{\beta}_i - \boldsymbol{\beta}_j\|_\infty \geq \|\boldsymbol{\beta}_i^0 - \boldsymbol{\beta}_j^0\|_\infty - 2\|\boldsymbol{\beta} - \boldsymbol{\beta}^0\|_\infty \geq b_n/p_n - 2\phi_n \geq a\lambda_n - 2\phi_n \gg \frac{a}{2}\lambda_n.$$

In addition, since  $\boldsymbol{\beta} \in \Theta_n$ , we have  $\boldsymbol{\beta}^* \in \Theta_n$  as well. Hence, with similar derivations, we have  $\|\boldsymbol{\beta}_i^* - \boldsymbol{\beta}_j^*\|_1 \gg \frac{a}{2}\lambda_n$ . Based on Assumption 4,

$$\sum_{i \in \mathcal{G}_k, j \in \mathcal{G}_{k'}, k \neq k'} p_{\lambda_n}(\|\boldsymbol{\beta}_i - \boldsymbol{\beta}_j\|_1) - \sum_{i \in \mathcal{G}_k, j \in \mathcal{G}_{k'}, k \neq k'} p_{\lambda_n}(\|\boldsymbol{\beta}_i^* - \boldsymbol{\beta}_j^*\|_1) = 0$$

Therefore, only the treatments that belong to the same group contribute to  $\Gamma_2$ . According to the same calculation in the proof of Theorem 2 from [7], we have

$$\begin{aligned}
\Gamma_2 &= \sum_{k=1}^{K_n} \sum_{i, j \in \mathcal{G}_k, i < j} p_{\lambda_n}(\|\boldsymbol{\beta}_i - \boldsymbol{\beta}_j\|_1) - \sum_{k=1}^{K_n} \sum_{i, j \in \mathcal{G}_k, i < j} p_{\lambda_n}(\|\boldsymbol{\beta}_i^* - \boldsymbol{\beta}_j^*\|_1) \\
&\geq \sum_{k=1}^{K_n} \sum_{i, j \in \mathcal{G}_k, i < j} p'_{\lambda_n}(\|\bar{\boldsymbol{\beta}}_i - \bar{\boldsymbol{\beta}}_j\|_1) \|\boldsymbol{\beta}_i - \boldsymbol{\beta}_j\|_1.
\end{aligned}$$

Combining the bound for  $\Gamma_1$  and  $\Gamma_2$ , we have

$$\begin{aligned}
Q_n(\boldsymbol{\beta}; \lambda_n) - Q_n(\boldsymbol{\beta}^*; \lambda_n) &= \Gamma_1 + \Gamma_2 \\
&\geq \sum_{k=1}^{K_n} \sum_{i, j \in \mathcal{G}_k, i < j} \left( p'_{\lambda_n}(\|\bar{\boldsymbol{\beta}}_i - \bar{\boldsymbol{\beta}}_j\|_1) - \frac{\mathcal{O}(\sqrt{n \log n})}{|\mathcal{G}_k|} \right) \|\boldsymbol{\beta}_i - \boldsymbol{\beta}_j\|_1.
\end{aligned}$$

Note that  $\|\bar{\boldsymbol{\beta}}_i - \bar{\boldsymbol{\beta}}_j\|_1 \leq \|\bar{\boldsymbol{\beta}}_i - \boldsymbol{\beta}_i^0\|_1 + \|\bar{\boldsymbol{\beta}}_j - \boldsymbol{\beta}_j^0\|_1 \leq 2\phi_n$ . Hence, based on Assumption 4,  $p'_{\lambda_n}(\|\bar{\boldsymbol{\beta}}_i - \bar{\boldsymbol{\beta}}_j\|_1) \geq \mathcal{O}(\sqrt{n \log n})/\inf_{1 \leq k \leq K_n} |\mathcal{G}_k|$ . This completes the proof.  $\square$

## C Additional Figures

## D PDX Data

The PDX data we used in real data analysis can be downloaded from <https://www.tandfonline.com/doi/suppl/10.1080/01621459.2020.1828091?scroll=top>.

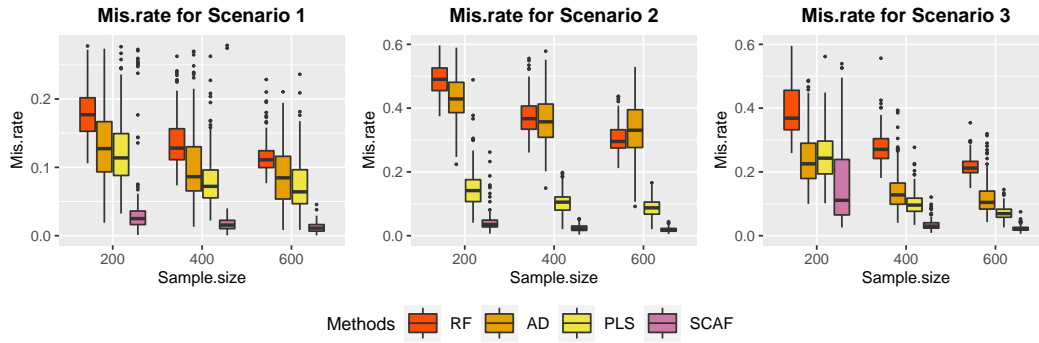

Figure C.1: Boxplots of misclassification rate based on the testing data in simulations.

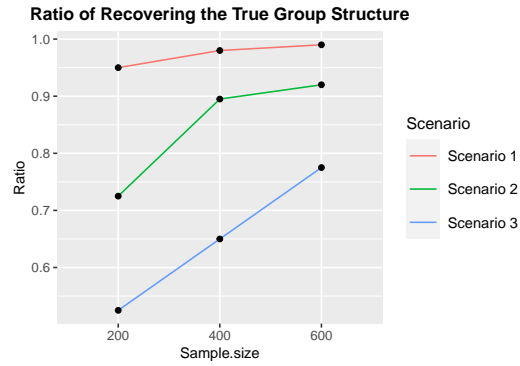

Figure C.2: Ratio of recovering the true group structure among 200 replications in simulations.

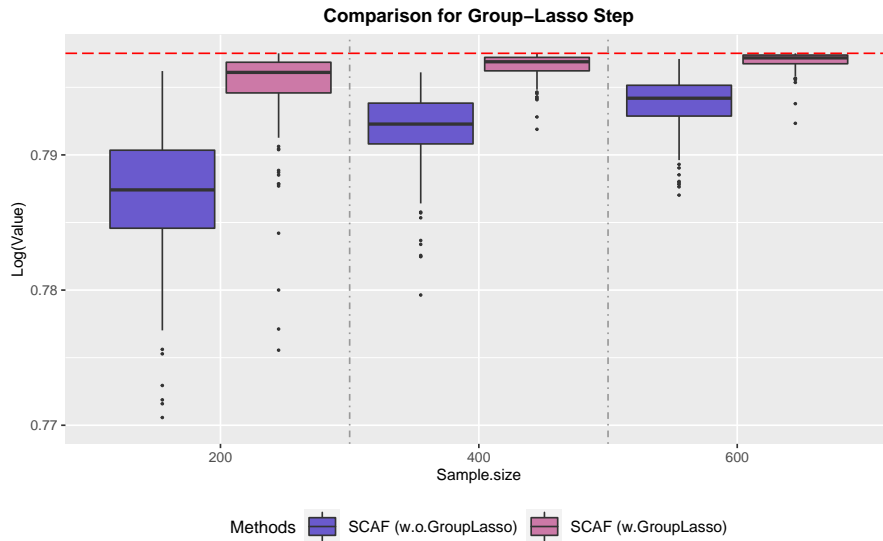

Figure C.3: Boxplots of empirical value for SCAF (with/without group-lasso step) in Scenario 1.

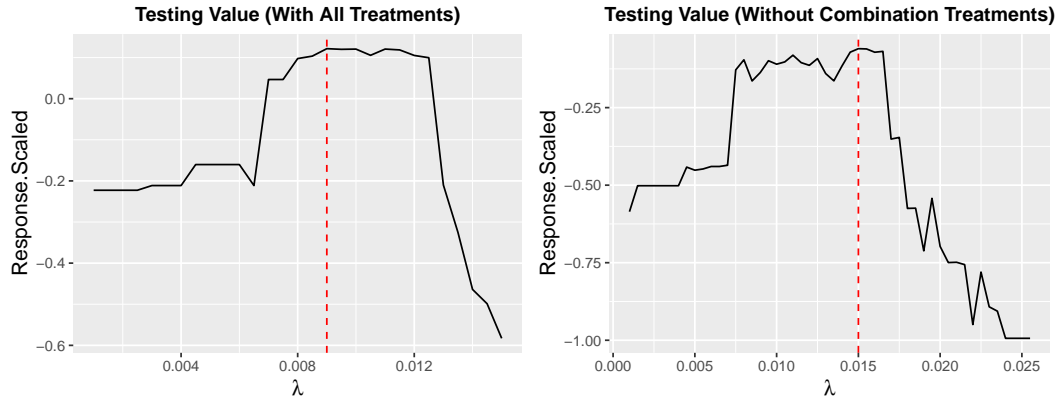

Figure C.4: Path of empirical value on the testing data as  $\lambda$  increases in PDX study. The red vertical dotted lines show the best tuned  $\lambda$  using cross-validation.

## References

- [1] Xin Zhou, Nicole Mayer-Hamblett, Umer Khan, and Michael R Kosorok. Residual weighted learning for estimating individualized treatment rules. *Journal of the American Statistical Association*, 112(517):169–187, 2017.
- [2] Ying Liu, Yuanjia Wang, Michael R Kosorok, Yingqi Zhao, and Donglin Zeng. Augmented outcome-weighted learning for estimating optimal dynamic treatment regimens. *Statistics in medicine*, 37(26):3776–3788, 2018.
- [3] Weibin Mo and Yufeng Liu. Efficient learning of optimal individualized treatment rules for heteroscedastic or misspecified treatment-free effect models. *arXiv preprint arXiv:2109.02570*, 2021.
- [4] Susan Athey, Julie Tibshirani, and Stefan Wager. Generalized random forests. *The Annals of Statistics*, 47(2):1148–1178, 2019.
- [5] Jingxiang Chen, Quoc Tran-Dinh, Michael R Kosorok, and Yufeng Liu. Identifying heterogeneous effect using latent supervised clustering with adaptive fusion. *Journal of Computational and Graphical Statistics*, 30(1):43–54, 2021.
- [6] Amir Beck and Marc Teboulle. A fast iterative shrinkage-thresholding algorithm for linear inverse problems. *SIAM journal on imaging sciences*, 2(1):183–202, 2009.
- [7] Shujie Ma and Jian Huang. A concave pairwise fusion approach to subgroup analysis. *Journal of the American Statistical Association*, 112(517):410–423, 2017.
